# Supplementary material for: Impact of converging sociocultural and substance-related trends on US autism rates: combined geospatiotemporal and causal inferential analysis
Source: Springer Nature journal article supplement (doi:10.1007/s00406-022-01446-0), 2022-07-02

# Major Drug, Ethnic and Income Paramaters, USA, 2000–2018

Data: DEA, US Census Bureau, NSDUH, SAMHSA

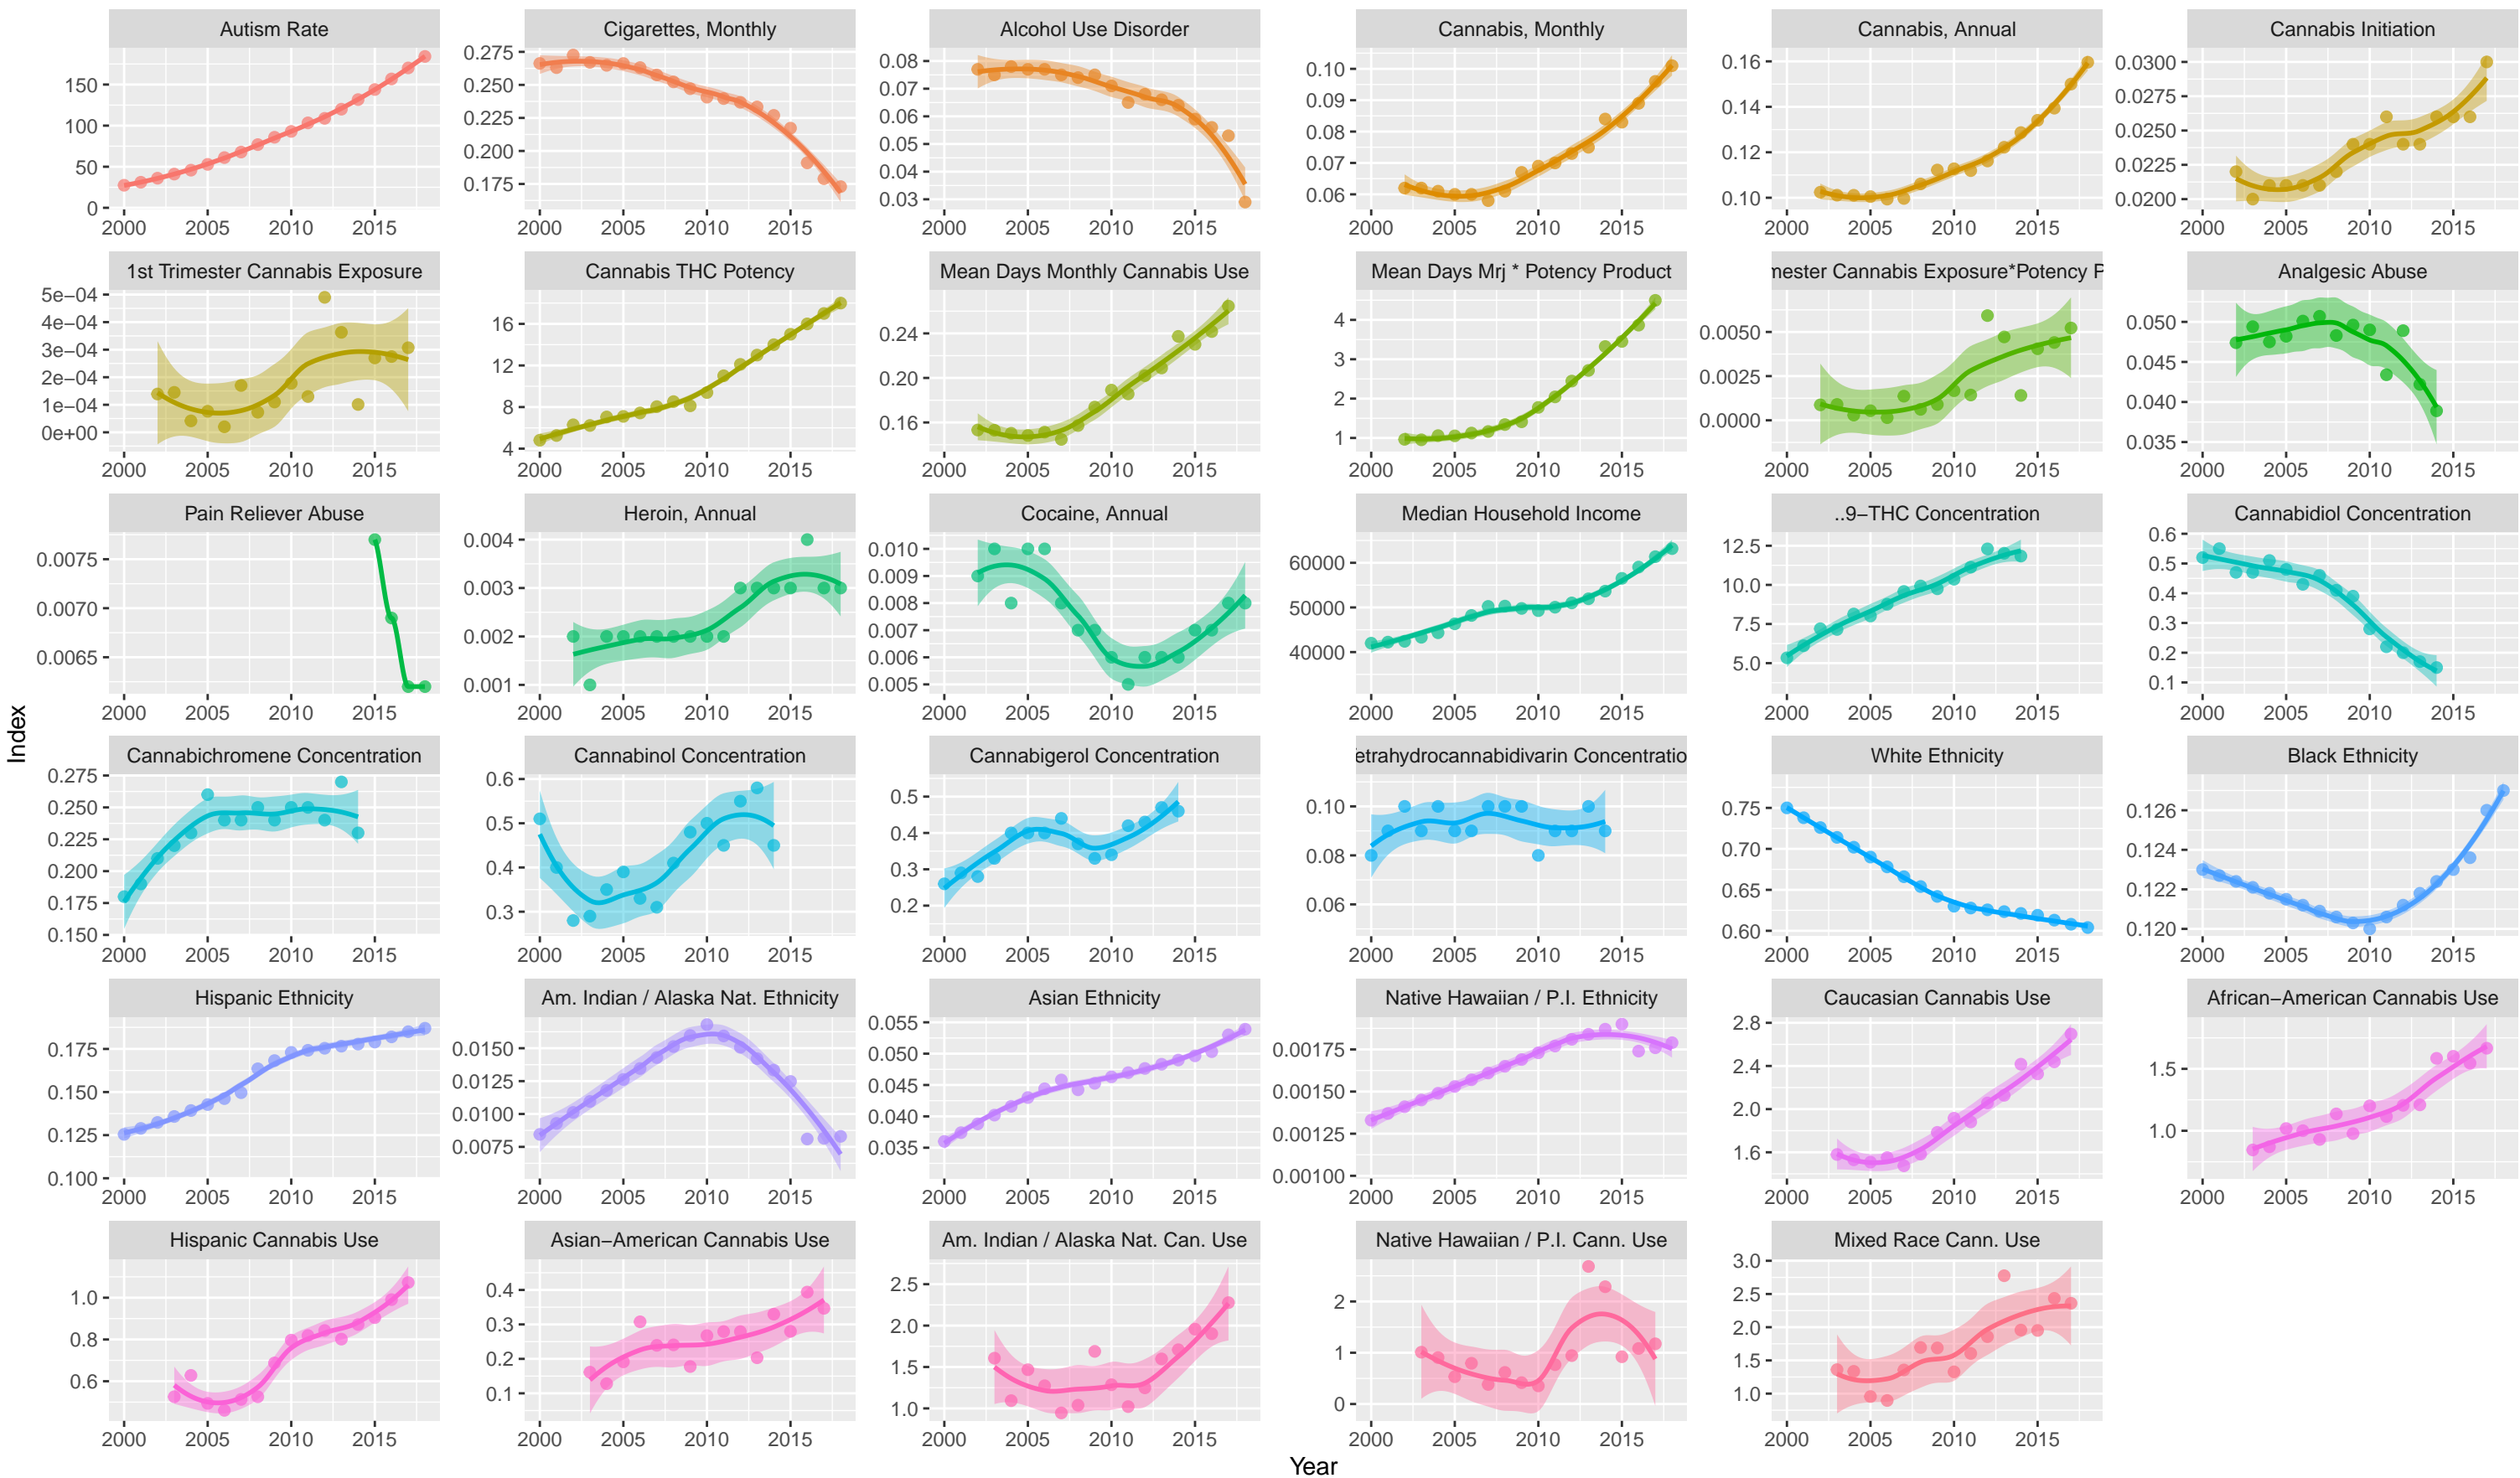

Supplement: MOESM2 [file 23232132]
