# Supplementary material for: Impact of converging sociocultural and substance-related trends on US autism rates: combined geospatiotemporal and causal inferential analysis
Source: Springer Nature journal article supplement (doi:10.1007/s00406-022-01446-0), 2022-07-02

# Mean Monthly Days of Cannabis Use by Less Populous Ethnicities

Data – NSDUH, SAMHSA, 2002–2017

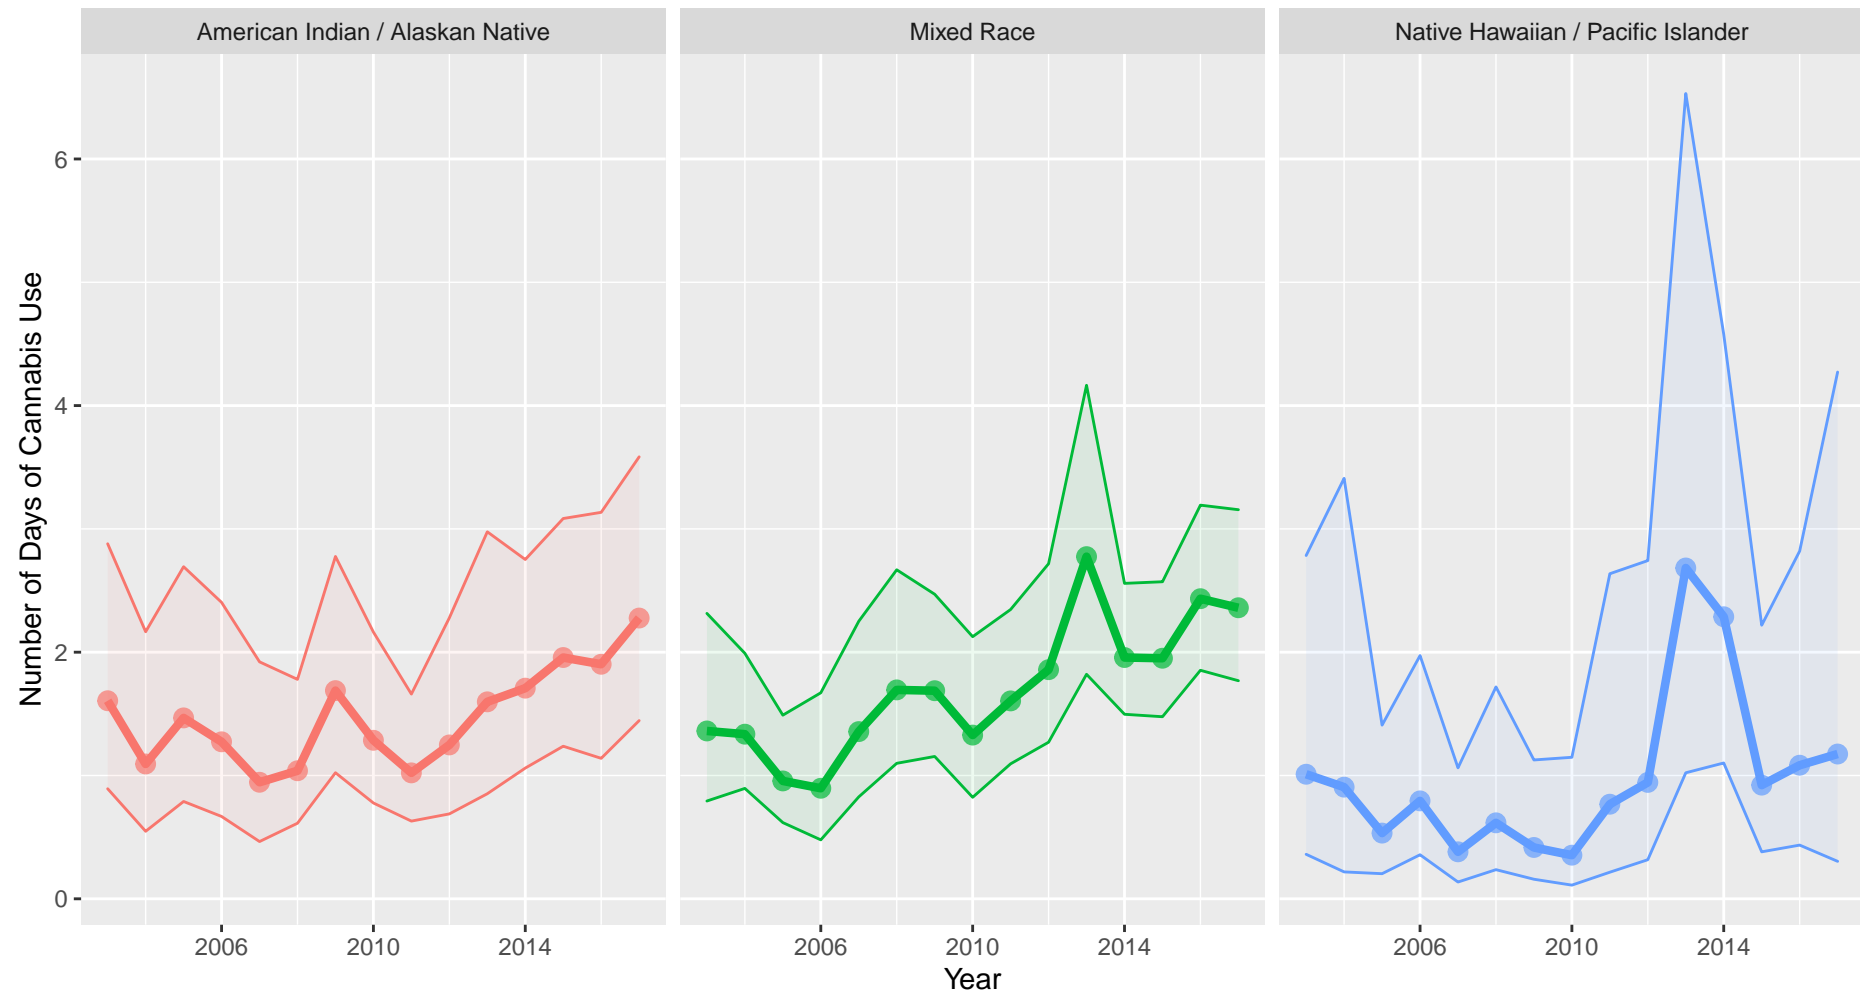

Supplement: MOESM4 [file 23232132]
