# Supplementary material for: Impact of converging sociocultural and substance-related trends on US autism rates: combined geospatiotemporal and causal inferential analysis
Source: Springer Nature journal article supplement (doi:10.1007/s00406-022-01446-0), 2022-07-02
Supplement: MOESM5 [file 23232132]

Sum of Race-Time Products by US State Index 2003–2011

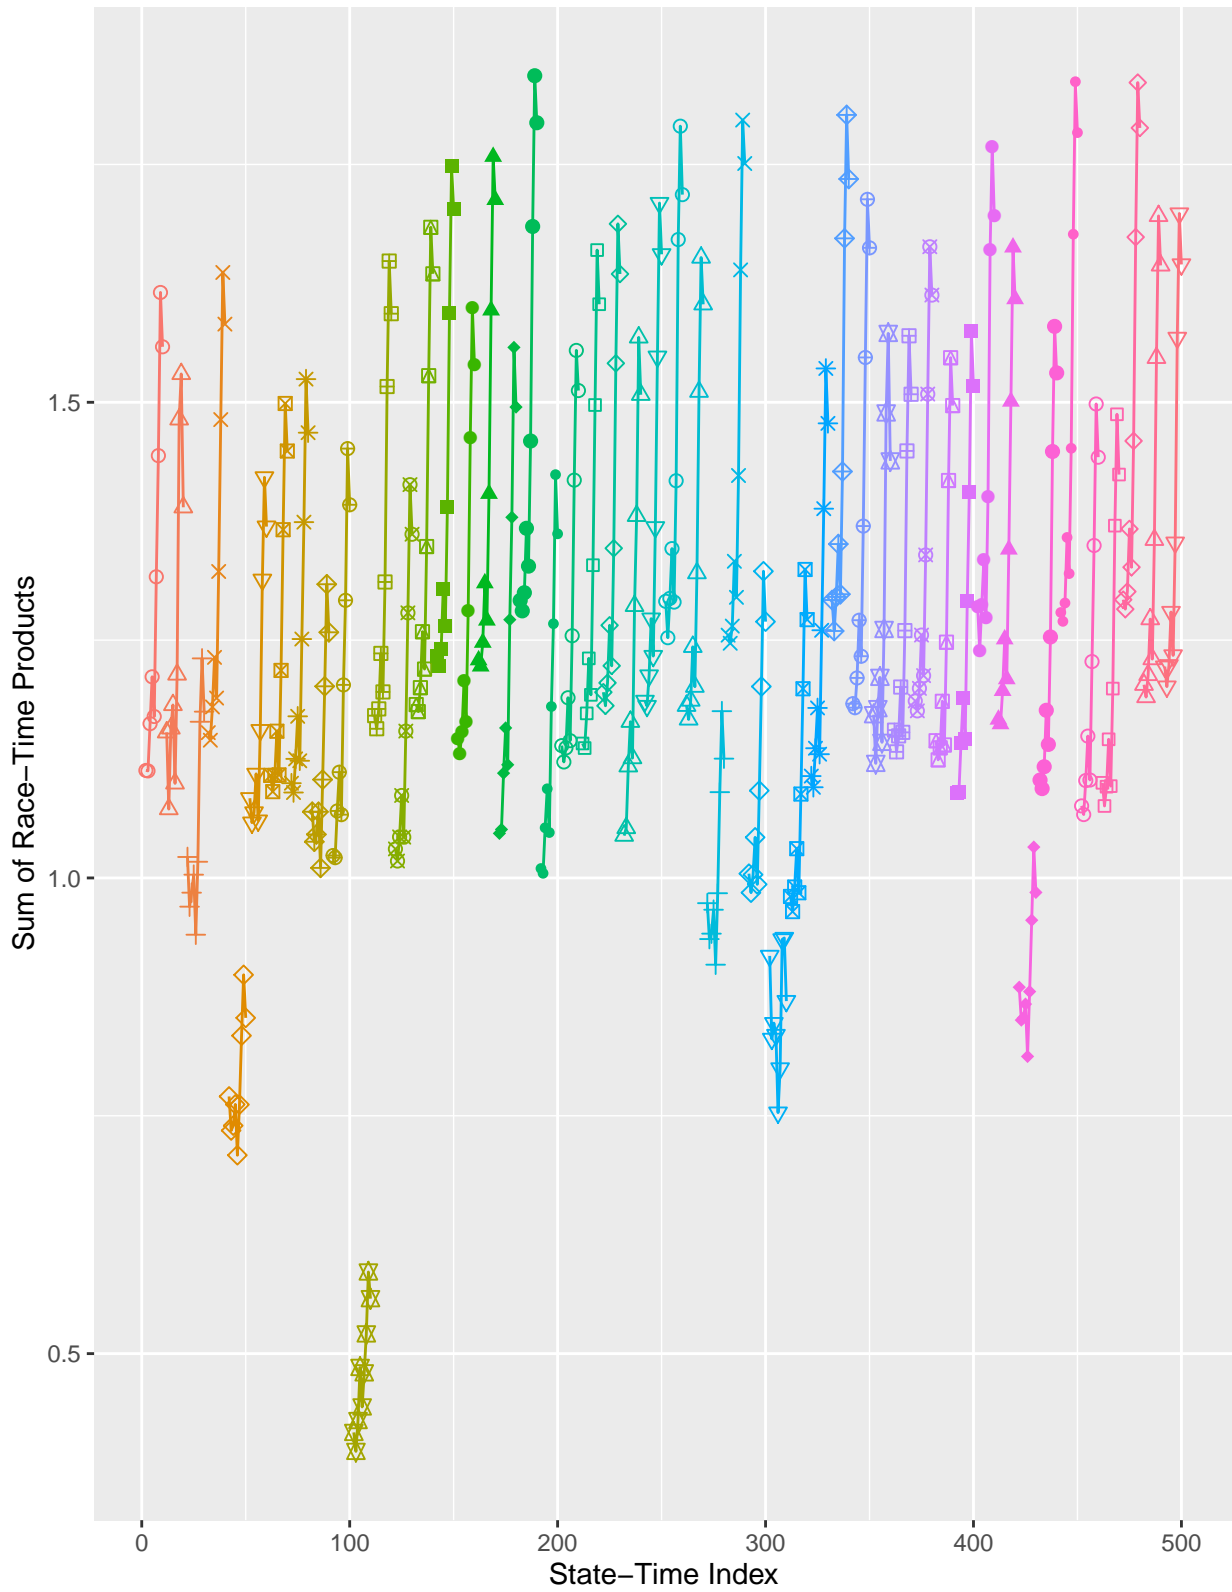

Sum of Race-Time Products by US State Over Time 2003–2011

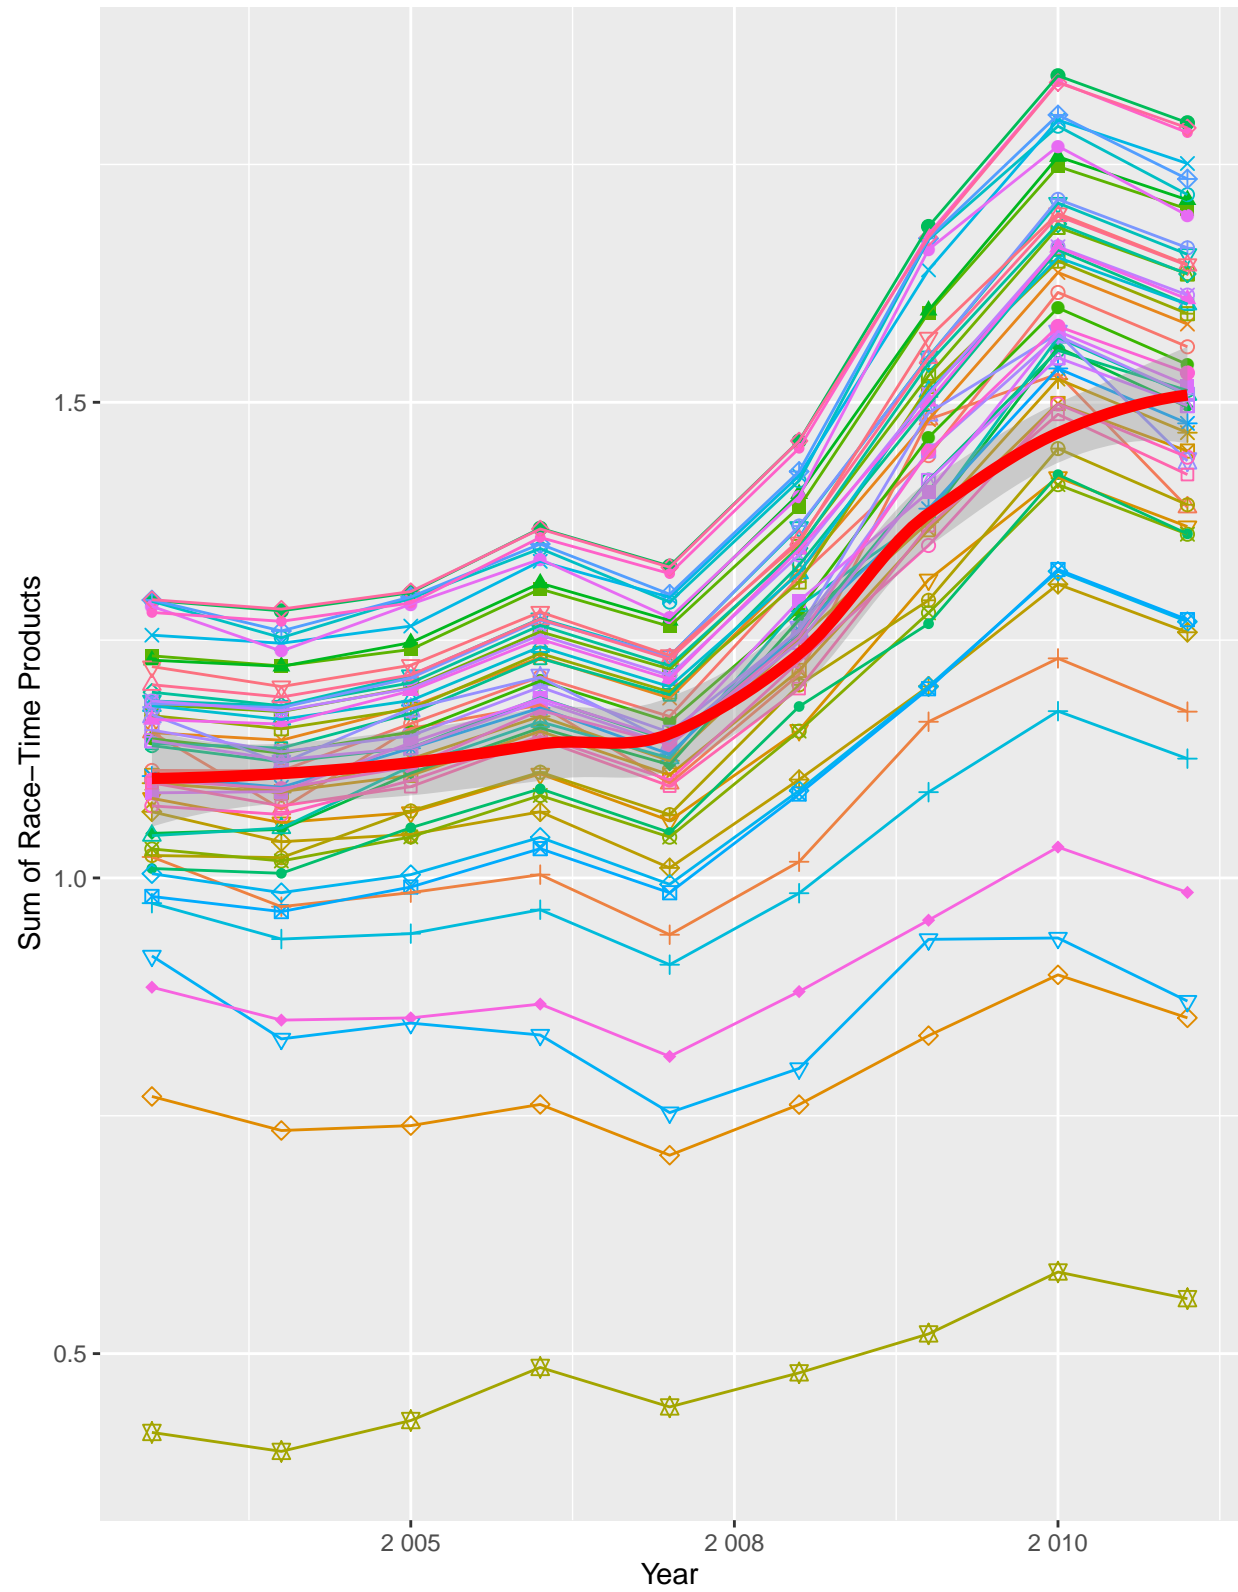

- |          |             |         |          |           |               |          |               |                |                |              |               |            |
|----------|-------------|---------|----------|-----------|---------------|----------|---------------|----------------|----------------|--------------|---------------|------------|
| Alabama  | California  | Florida | Illinois | Kentucky  | Massachusetts | Missouri | New Hampshire | North Carolina | Oregon         | South Dakota | Vermont       | Wisconsin  |
| Alaska   | Colorado    | Georgia | Indiana  | Louisiana | Michigan      | Montana  | New Jersey    | North Dakota   | Pennsylvania   | Tennessee    | Virginia      | Wyoming    |
| Arizona  | Connecticut | Hawaii  | Iowa     | Maine     | Minnesota     | Nebraska | New Mexico    | New York       | Ohio           | Rhode Island | Texas         | Washington |
| Arkansas | Delaware    | Idaho   | Kansas   | Maryland  | Mississippi   | Nevada   | New York      | Oklahoma       | South Carolina | Utah         | West Virginia |            |
