# Supplementary material for: Impact of converging sociocultural and substance-related trends on US autism rates: combined geospatiotemporal and causal inferential analysis
Source: Springer Nature journal article supplement (doi:10.1007/s00406-022-01446-0), 2022-07-02

Percent Daily or Near Daily Cannabis Use During Pregnancy  
by Age Group and Trimester, Regression Lines, USA, NSDUH, SAMHSA

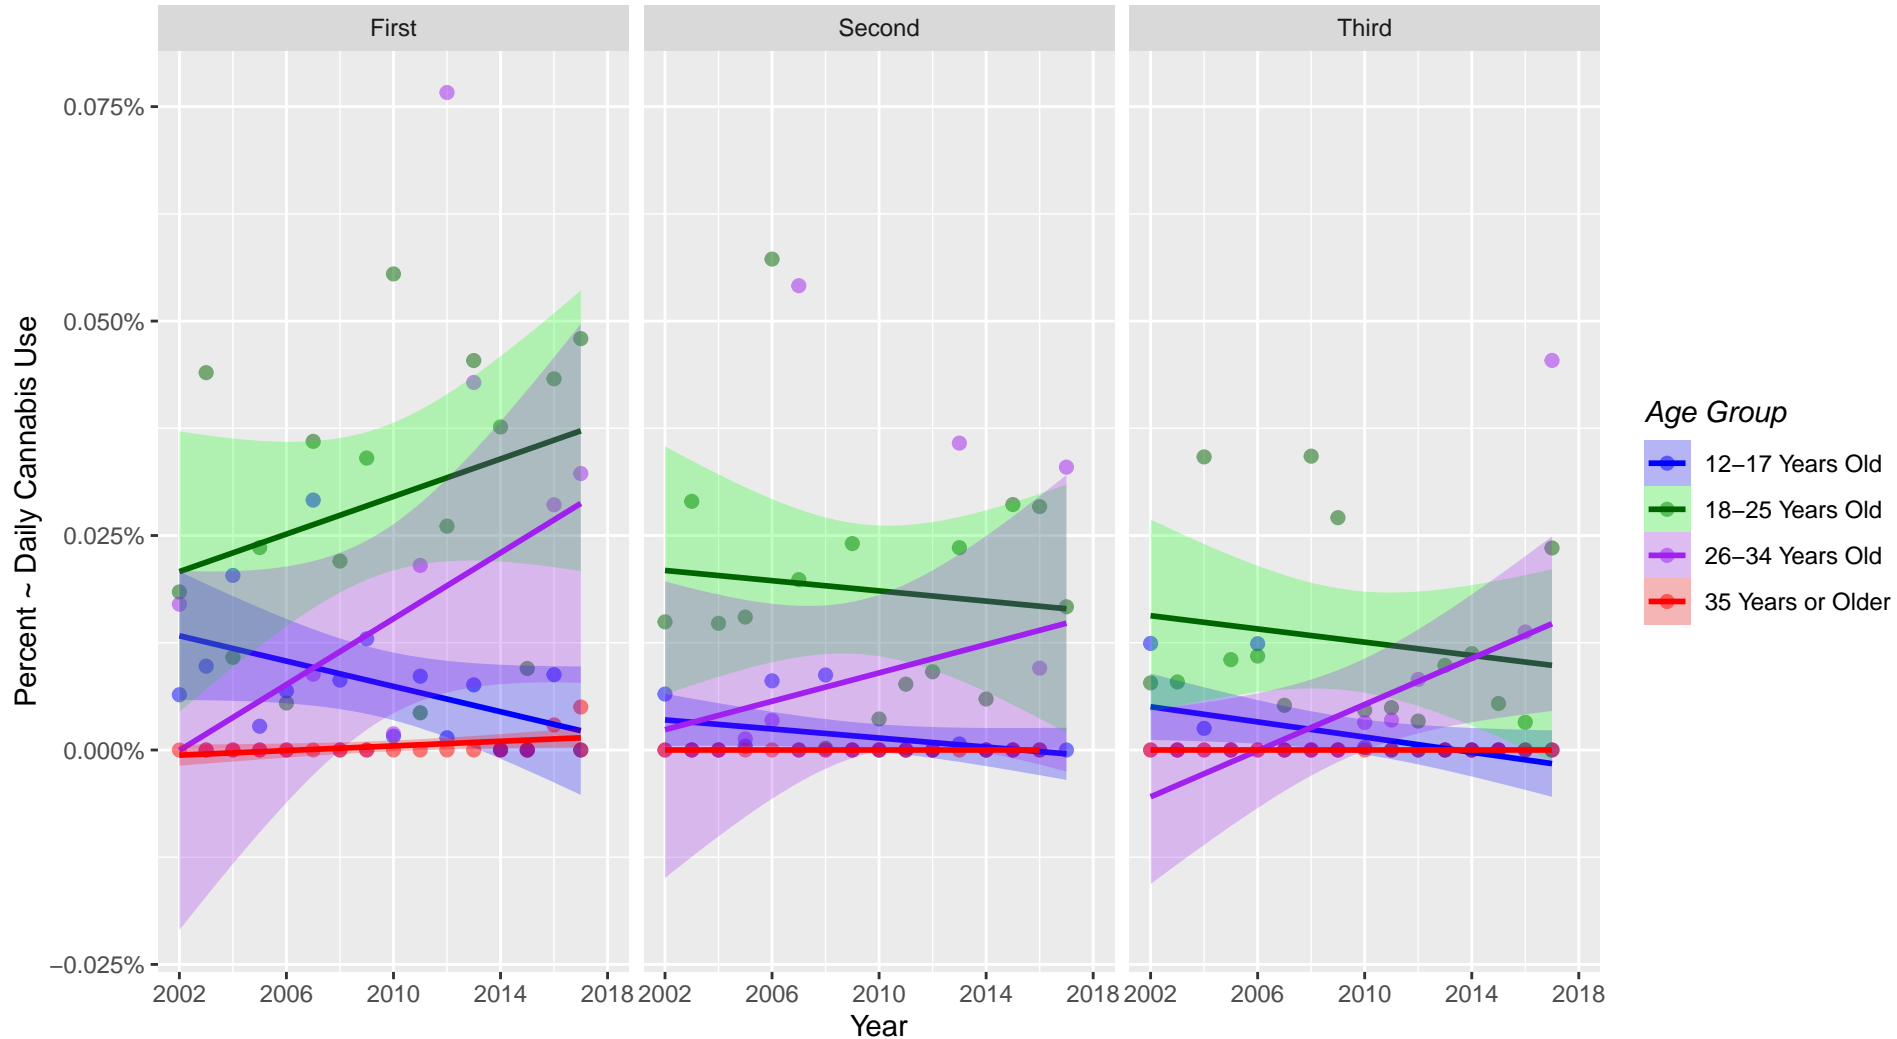

Supplement: MOESM7 [file 23232132]
