# Supplementary material for: Impact of converging sociocultural and substance-related trends on US autism rates: combined geospatiotemporal and causal inferential analysis
Source: Springer Nature journal article supplement (doi:10.1007/s00406-022-01446-0), 2022-07-02

# US Age of Maternal Child Bearing Over Time

## Data – CDC Wonder Births Registries

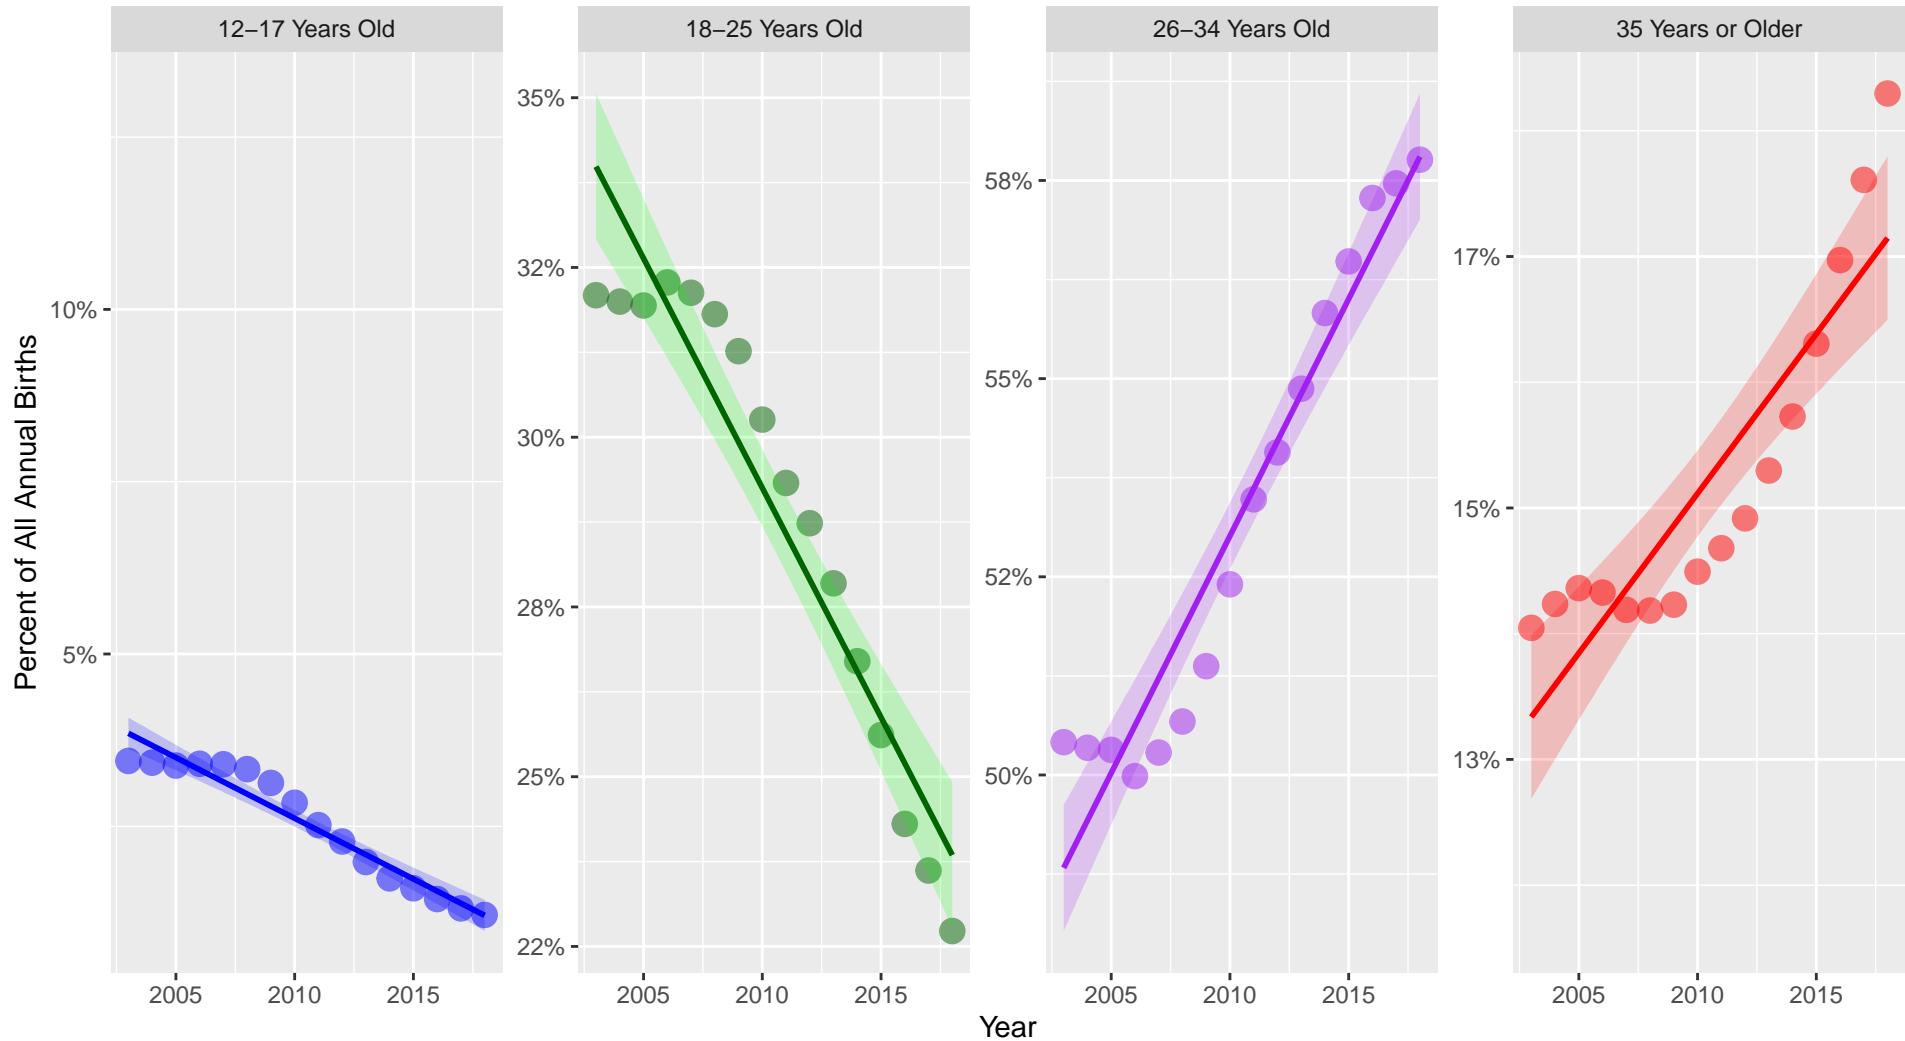

Supplement: MOESM8 [file 23232132]
