# Supplementary material for: Impact of converging sociocultural and substance-related trends on US autism rates: combined geospatiotemporal and causal inferential analysis
Source: Springer Nature journal article supplement (doi:10.1007/s00406-022-01446-0), 2022-07-02

**A**

Geospatial Interstate "Queen" Links, USA (blue) and  
Additional Links After Eliding Hawaii and Alaska (Conceptually) (in red)

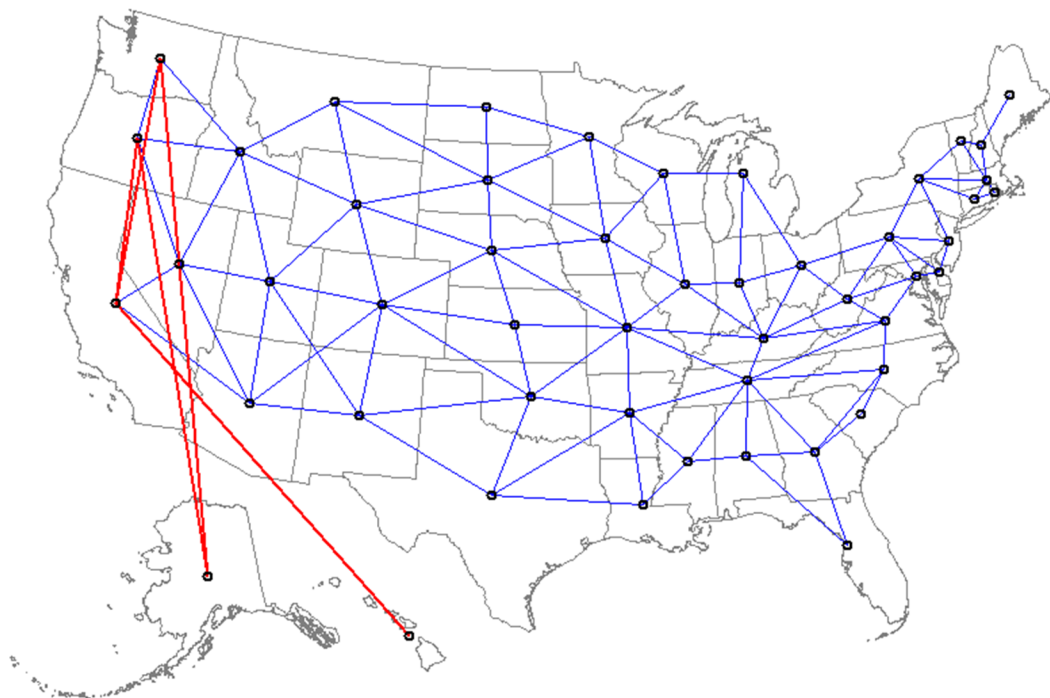**B**

Final Geospatial Interstate "Queen" Links, USA

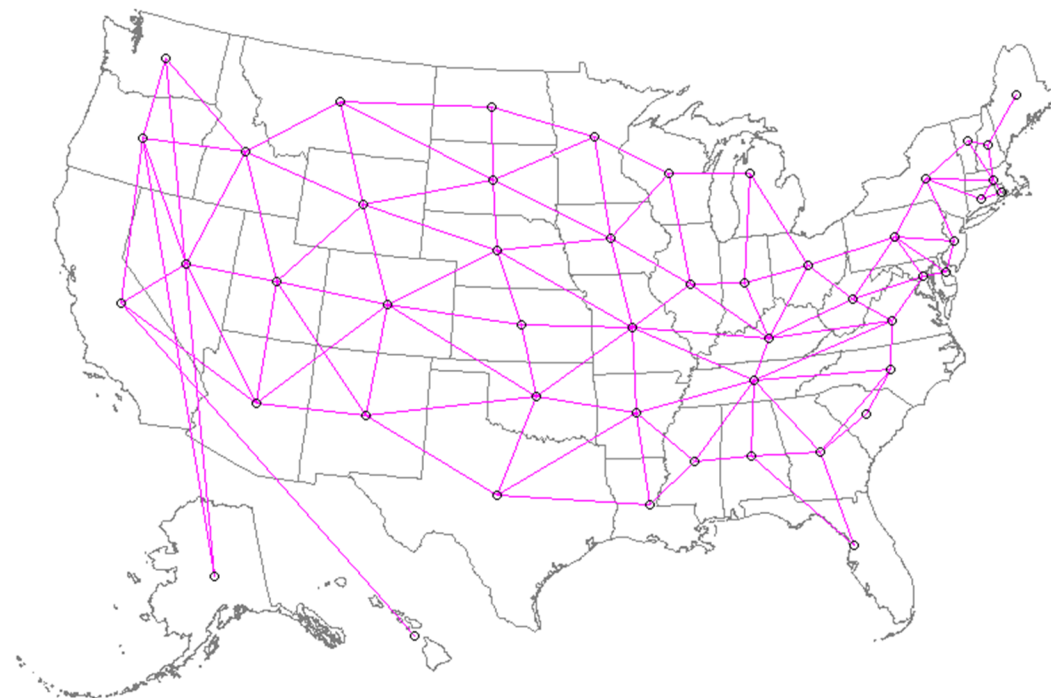

Supplement: MOESM9 [file 23232132]
