# Supplementary material for: Impact of converging sociocultural and substance-related trends on US autism rates: combined geospatiotemporal and causal inferential analysis
Source: Springer Nature journal article supplement (doi:10.1007/s00406-022-01446-0), 2022-07-02

**Autism Rate v Cannabinoid Exposure - Surface Plot**  
 - THC and Cannabigerol Exposure

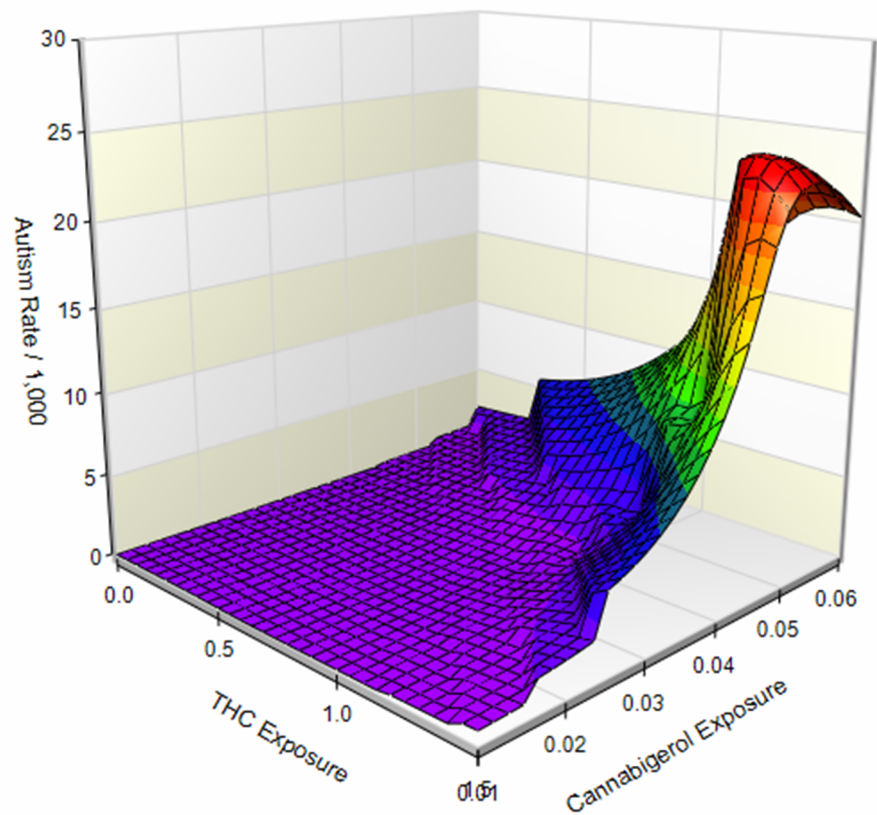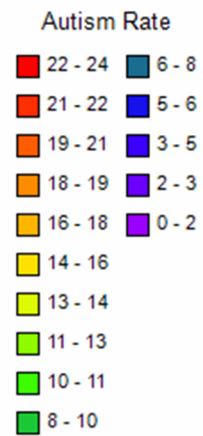

**Autism Rate v Cannabinoid Exposure - Surface Plot**  
 - THC and Cannabigerol Exposure

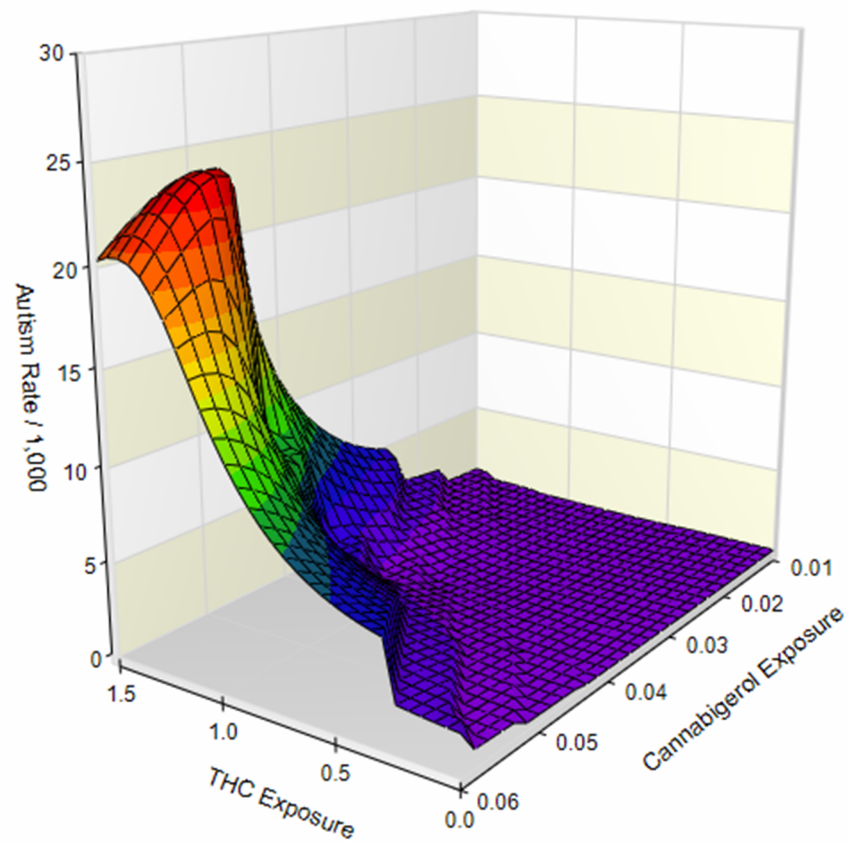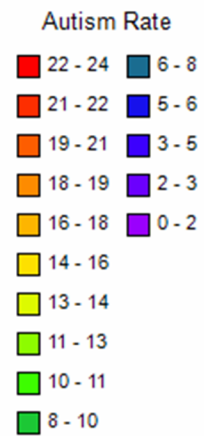

Supplement: MOESM10 [file 23232132]
