# Supplementary material for: Impact of converging sociocultural and substance-related trends on US autism rates: combined geospatiotemporal and causal inferential analysis
Source: Eur Arch Psychiatry Clin Neurosci. 2022 Jul 2;273(3):699–717. doi: 10.1007/s00406-022-01446-0 (PMC10085966; doi:10.1007/s00406-022-01446-0)
Supplement: Supplementary file 1 — Supplementary file1 (DOCX 100 KB) [file 406_2022_1446_MOESM1_ESM.docx]

**Table of Contents**

**Supplementary Tables - eTables**

| **Item** | **eTables** | **Page No.** |
| --- | --- | --- |
|  |  |  |
| Text | Statistical Methods | 2 |
|  |  |  |
| eTable 1 | National Data Input | 3 |
| eTable 2 | National Patterns of Monthly Cannabis Smoking | 7 |
| eTable 3 | Autism Rate by Ethnicity, Interactive Time-Dependent Model | 8 |
| eTable 4 | Robustness Analysis with High and Low Forward Estimates of Autism Rates | 9 |
| eTable 5 | Spatiotemporal spreml Lagged Models with Drugs, Ethnicity and Socioeconomic Covariates | 11 |
| eTable 6 | Spatiotemporal spreml Lagged Models with Drugs, Ethnic Cannabis Use and Socioeconomic Covariates | 13 |
| eTable 7 | Full Geospatial Results Including Model Parameters | 15 |
| eTable 8 | Deciles of THC and Cannabigerol Exposure | 17 |
| eTable 9 | Predicted Model Outputs | 18 |
| eTable 10 | Weighted Mixed Effects Regression Models | 19 |

Statistical Methods

Programs used.

Data was processed using “R Studio” version 1.2.5042 based on “R” version 4.0.0 1. Graphs were drawn with R package ggplot2 2 and bivariate graphs were drawn using colorplaner 3,4. R package sf (“Simple Features”) was used for map drawing 5. Data was manipulated with dplyr amongst others 3. Multiple graphs were assembled with ggarrange from ggpubr 6. 3D graphs were drawn using NCSS software 7. Correlation tests were calculated using cor.test from R-package stats. For straightforward linear regression least squares regression was employed from R-Base. Panel regression was performed using R package plm 8,9. Function spreml from the splm package was used for geospatial analyses 9-11.

**References**

1. R-3.6.1 for Windows (32/64 bit). CRAN: Central "R" Archive Network, 2020. (Accessed March 5th 2020, 2020, at <https://cran.r-project.org/bin/windows/base/>.)

2. Wickham H. ggplot2: Elegant Graphics for Data Analysis. New York: Springer-Verlag; 2016.

3. Wickham H., Averick M., Bryan J., et al. Welcome to the Tidyverse. Journal of Open Source Software 2019;4:1686-91.

4. Colorplaner: ggplot2 Extension to Visualize Two Variables Per Color Aesthetic Through Colorspace Projection. Github, 2020. (Accessed October 6th 2020, 2020, at <https://github.com/wmurphyrd/colorplaner>.)

5. Pebesma E. Simple Features for R: Standardized Suport for Spatial Vector Data. The R Journal 2018;10:439-46.

6. ggpubr: 'ggplot2' Based Publication Ready Plots. R package version 0.4.0, 2020. (Accessed 12th December 2020, 2020, at <https://CRAN.R-project.org/package=ggpubr>.)

7. NCSS Statistical Software. NCSS, LLC, 2020. (Accessed 26th April 2020, 2020, at <https://www.ncss.com/>.)

8. Package 'plm'. CRAN: Central "R" Archive Network, 2014. (Accessed 7th May 2020, 2020, at <https://cran.r-project.org/web/packages/plm/plm.pdf>.)

9. Croissant Y., Millo G. Panel Data Econometrics with R. Hoboken, New JErsey, USA; West Sussex, U.K.: Wiley and Sons; 2019.

10. Millo G., Piras G. splm: Spatial Panel Data Models in R. Journal of Stastistical Software 2012;47:1-38.

11. Millo G., Piras G. Package 'splm'. <https://cran.r-project.org/web/packages/splm/splm.pdf> ed. Trieste, Italy: CRAN (Central R-Archive Network); 2018:1-27.

**eTable 1.: National Level Data Inputs**

| Year | AutRtNat | Cigarette Use, Monthly | Alcophol Use Disorder | Cannabis Use Last Month | Cannabis Use Last Year | Cannabis Incidence | TrimCanExp | Potency | MeanMonthly Days of Cannabis Use | Mean Days Cannabis Use * Potency Product | Cannabis Use First Trimester Pregnancy | Heroin Use, Annual | Cocaine Use Annual |
| --- | --- | --- | --- | --- | --- | --- | --- | --- | --- | --- | --- | --- | --- |
| 1994 | 6.9847 |  |  |  |  |  |  |  |  |  |  |  |  |
| 1995 | 8.7784 |  |  |  |  |  |  |  |  |  |  |  |  |
| 1996 | 10.5553 |  |  |  |  |  |  |  |  |  |  |  |  |
| 1997 | 12.9676 |  |  |  |  |  |  |  |  |  |  |  |  |
| 1998 | 17.0946 |  |  |  |  |  |  |  |  |  |  |  |  |
| 1999 | 21.6236 |  |  |  |  |  |  |  |  |  |  |  |  |
| 2000 | 27.4305 | 0.2662 |  |  |  |  |  | 4.8105 |  |  |  |  |  |
| 2001 | 31.0914 | 0.2631 |  |  |  |  |  | 5.2638 |  |  |  |  |  |
| 2002 | 36.0045 | 0.2726 | 0.0770 | 0.0620 | 0.1024 | 0.0220 | 0.0001 | 6.2960 | 0.1532 | 0.9647 | 0.0009 | 0.0020 | 0.0090 |
| 2003 | 41.0293 | 0.2670 | 0.0750 | 0.0620 | 0.1011 | 0.0200 | 0.0001 | 6.2296 | 0.1530 | 0.9533 | 0.0009 | 0.0010 | 0.0100 |
| 2004 | 45.7927 | 0.2648 | 0.0780 | 0.0610 | 0.1011 | 0.0210 | 0.0000 | 7.0486 | 0.1503 | 1.0593 | 0.0003 | 0.0020 | 0.0080 |
| 2005 | 52.8350 | 0.2662 | 0.0770 | 0.0600 | 0.1005 | 0.0210 | 0.0001 | 7.1042 | 0.1483 | 1.0535 | 0.0005 | 0.0020 | 0.0100 |
| 2006 | 61.0944 | 0.2631 | 0.0770 | 0.0600 | 0.0994 | 0.0210 | 0.0000 | 7.4347 | 0.1513 | 1.1249 | 0.0001 | 0.0020 | 0.0100 |
| 2007 | 67.8476 | 0.2575 | 0.0750 | 0.0580 | 0.0997 | 0.0210 | 0.0002 | 8.0399 | 0.1448 | 1.1640 | 0.0014 | 0.0020 | 0.0080 |
| 2008 | 76.9083 | 0.2523 | 0.0740 | 0.0610 | 0.1061 | 0.0220 | 0.0001 | 8.5237 | 0.1572 | 1.3403 | 0.0006 | 0.0020 | 0.0070 |
| 2009 | 85.8341 | 0.2471 | 0.0750 | 0.0670 | 0.1122 | 0.0240 | 0.0001 | 8.1207 | 0.1738 | 1.4114 | 0.0009 | 0.0020 | 0.0070 |
| 2010 | 92.9588 | 0.2407 | 0.0710 | 0.0690 | 0.1127 | 0.0240 | 0.0002 | 9.3977 | 0.1890 | 1.7766 | 0.0017 | 0.0020 | 0.0060 |
| 2011 | 103.3607 | 0.2397 | 0.0650 | 0.0700 | 0.1119 | 0.0260 | 0.0001 | 11.0107 | 0.1856 | 2.0438 | 0.0014 | 0.0020 | 0.0050 |
| 2012 | 108.8500 | 0.2368 | 0.0680 | 0.0730 | 0.1162 | 0.0240 | 0.0005 | 12.1051 | 0.2020 | 2.4452 | 0.0059 | 0.0030 | 0.0060 |
| 2013 | 119.9700 | 0.2333 | 0.0660 | 0.0750 | 0.1222 | 0.0240 | 0.0004 | 13.0000 | 0.2089 | 2.7162 | 0.0047 | 0.0030 | 0.0060 |
| 2014 | 131.6700 | 0.2269 | 0.0640 | 0.0840 | 0.1287 | 0.0260 | 0.0001 | 14.0000 | 0.2373 | 3.3226 | 0.0014 | 0.0030 | 0.0060 |
| 2015 | 143.9400 | 0.2172 | 0.0590 | 0.0830 | 0.1341 | 0.0260 | 0.0003 | 15.0000 | 0.2302 | 3.4528 | 0.0041 | 0.0030 | 0.0070 |
| 2016 | 156.7900 | 0.1910 | 0.0560 | 0.0890 | 0.1394 | 0.0260 | 0.0003 | 16.0000 | 0.2417 | 3.8666 | 0.0044 | 0.0040 | 0.0070 |
| 2017 | 170.2100 | 0.1790 | 0.0530 | 0.0960 | 0.1500 | 0.0300 | 0.0003 | 17.0000 | 0.2645 | 4.4964 | 0.0052 | 0.0030 | 0.0080 |
| 2018 | 184.2000 | 0.1730 | 0.0290 | 0.1010 | 0.1596 |  |  | 18.0000 |  |  |  | 0.0030 | 0.0080 |

| Year | US_MHY | d9_THC | CBD | CBC | CBN | CBG | THCV | White | Black | Hispanic | AIAN | Asian |
| --- | --- | --- | --- | --- | --- | --- | --- | --- | --- | --- | --- | --- |
| 1994 | 32264 | 3.5000 | 0.4600 | 0.2200 | 0.3200 |  |  | 0.7817 | 0.1215 | 0.1041 | 0.0082 | 0.0313 |
| 1995 | 34076 | 3.9600 | 0.2800 | 0.1900 | 0.3900 | 0.1360 | 0.0500 | 0.7764 | 0.1218 | 0.1077 | 0.0083 | 0.0321 |
| 1996 | 35492 | 4.5100 | 0.3700 | 0.2000 | 0.3800 | 0.1600 | 0.0900 | 0.7712 | 0.1220 | 0.1112 | 0.0083 | 0.0328 |
| 1997 | 37005 | 5.0100 | 0.4100 | 0.1900 | 0.3400 | 0.2000 | 0.1100 | 0.7659 | 0.1223 | 0.1148 | 0.0083 | 0.0336 |
| 1998 | 38885 | 4.9000 | 0.4100 | 0.2000 | 0.3800 | 0.1700 | 0.0500 | 0.7606 | 0.1225 | 0.1183 | 0.0084 | 0.0344 |
| 1999 | 40696 | 4.6000 | 0.4200 | 0.1700 | 0.5500 | 0.1700 | 0.0700 | 0.7553 | 0.1228 | 0.1219 | 0.0084 | 0.0352 |
| 2000 | 41990 | 5.3400 | 0.5200 | 0.1800 | 0.5100 | 0.2600 | 0.0800 | 0.7500 | 0.1230 | 0.1255 | 0.0085 | 0.0360 |
| 2001 | 42228 | 6.1100 | 0.5500 | 0.1900 | 0.4000 | 0.2900 | 0.0900 | 0.7380 | 0.1227 | 0.1289 | 0.0093 | 0.0374 |
| 2002 | 42409 | 7.2000 | 0.4700 | 0.2100 | 0.2800 | 0.2800 | 0.1000 | 0.7260 | 0.1224 | 0.1324 | 0.0101 | 0.0388 |
| 2003 | 43318 | 7.1500 | 0.4700 | 0.2200 | 0.2900 | 0.3300 | 0.0900 | 0.7140 | 0.1221 | 0.1358 | 0.0110 | 0.0402 |
| 2004 | 44334 | 8.1400 | 0.5100 | 0.2300 | 0.3500 | 0.4000 | 0.1000 | 0.7020 | 0.1218 | 0.1393 | 0.0118 | 0.0416 |
| 2005 | 46326 | 8.0100 | 0.4800 | 0.2600 | 0.3900 | 0.4000 | 0.0900 | 0.6900 | 0.1215 | 0.1427 | 0.0126 | 0.0430 |
| 2006 | 48201 | 8.7600 | 0.4300 | 0.2400 | 0.3300 | 0.4000 | 0.0900 | 0.6780 | 0.1212 | 0.1462 | 0.0135 | 0.0444 |
| 2007 | 50233 | 9.5800 | 0.4600 | 0.2400 | 0.3100 | 0.4400 | 0.1000 | 0.6660 | 0.1209 | 0.1496 | 0.0143 | 0.0458 |
| 2008 | 50303 | 9.9300 | 0.4100 | 0.2500 | 0.4100 | 0.3700 | 0.1000 | 0.6540 | 0.1206 | 0.1635 | 0.0151 | 0.0442 |
| 2009 | 49777 | 9.7500 | 0.3900 | 0.2400 | 0.4800 | 0.3300 | 0.1000 | 0.6420 | 0.1203 | 0.1682 | 0.0160 | 0.0453 |
| 2010 | 49276 | 10.3600 | 0.2800 | 0.2500 | 0.5000 | 0.3400 | 0.0800 | 0.6300 | 0.1200 | 0.1730 | 0.0168 | 0.0463 |
| 2011 | 50054 | 11.1300 | 0.2200 | 0.2500 | 0.4500 | 0.4200 | 0.0900 | 0.6278 | 0.1206 | 0.1742 | 0.0159 | 0.0470 |
| 2012 | 51017 | 12.3000 | 0.2000 | 0.2400 | 0.5500 | 0.4300 | 0.0900 | 0.6256 | 0.1212 | 0.1754 | 0.0151 | 0.0476 |
| 2013 | 51939 | 12.0200 | 0.1700 | 0.2700 | 0.5800 | 0.4700 | 0.1000 | 0.6234 | 0.1218 | 0.1766 | 0.0142 | 0.0483 |
| 2014 | 53657 | 11.8400 | 0.1500 | 0.2300 | 0.4500 | 0.4600 | 0.0900 | 0.6212 | 0.1224 | 0.1778 | 0.0133 | 0.0490 |
| 2015 | 56516 |  |  |  |  |  |  | 0.6190 | 0.1230 | 0.1790 | 0.0125 | 0.0497 |
| 2016 | 59039 |  |  |  |  |  |  | 0.6130 | 0.1236 | 0.1820 | 0.0081 | 0.0503 |
| 2017 | 61372 |  |  |  |  |  |  | 0.6080 | 0.1260 | 0.1850 | 0.0082 | 0.0530 |
| 2018 | 63179 |  |  |  |  |  |  | 0.6040 | 0.1270 | 0.1870 | 0.0083 | 0.0539 |

| Year | HIPI | NHWhite Cannabis Use | NHBlack Cannabis Use | Hispanic Cannabis Use | Asian Cannabis Use | AIAN Cannabis Use | NHPI Cannabis Use | Mixed Cannabis Use | AutRtHi | AutRtLo |
| --- | --- | --- | --- | --- | --- | --- | --- | --- | --- | --- |
| 1994 | 0.0010 |  |  |  |  |  |  |  | 8.25 | 5.68 |
| 1995 | 0.0011 |  |  |  |  |  |  |  | 10.8 | 7.81 |
| 1996 | 0.0011 |  |  |  |  |  |  |  | 13.92 | 10.25 |
| 1997 | 0.0012 |  |  |  |  |  |  |  | 17.6 | 13.01 |
| 1998 | 0.0012 |  |  |  |  |  |  |  | 21.85 | 16.09 |
| 1999 | 0.0013 |  |  |  |  |  |  |  | 26.66 | 19.49 |
| 2000 | 0.0013 |  |  |  |  |  |  |  | 32.03 | 23.21 |
| 2001 | 0.0014 |  |  |  |  |  |  |  | 37.97 | 27.24 |
| 2002 | 0.0014 |  |  |  |  |  |  |  | 44.47 | 31.59 |
| 2003 | 0.0015 | 1.5794 | 0.8455 | 0.5256 | 0.1614 | 1.6063 | 1.0104 | 1.3612 | 51.54 | 36.26 |
| 2004 | 0.0015 | 1.5303 | 0.8709 | 0.6278 | 0.1280 | 1.0936 | 0.9057 | 1.3352 | 59.17 | 41.24 |
| 2005 | 0.0015 | 1.5084 | 1.0182 | 0.4938 | 0.1914 | 1.4672 | 0.5331 | 0.9560 | 67.36 | 46.55 |
| 2006 | 0.0016 | 1.5508 | 1.0009 | 0.4605 | 0.3076 | 1.2733 | 0.7943 | 0.8965 | 76.12 | 52.17 |
| 2007 | 0.0016 | 1.4747 | 0.9299 | 0.5128 | 0.2392 | 0.9452 | 0.3812 | 1.3560 | 85.44 | 58.11 |
| 2008 | 0.0017 | 1.5827 | 1.1363 | 0.5254 | 0.2407 | 1.0386 | 0.6164 | 1.6943 | 95.33 | 64.36 |
| 2009 | 0.0017 | 1.7845 | 0.9773 | 0.6877 | 0.1777 | 1.6886 | 0.4164 | 1.6878 | 105.78 | 70.94 |
| 2010 | 0.0017 | 1.9158 | 1.2013 | 0.7967 | 0.2675 | 1.2857 | 0.3539 | 1.3279 | 116.79 | 77.83 |
| 2011 | 0.0018 | 1.8810 | 1.1152 | 0.8187 | 0.2792 | 1.0214 | 0.7672 | 1.6050 | 128.37 | 85.04 |
| 2012 | 0.0018 | 2.0573 | 1.2055 | 0.8428 | 0.2791 | 1.2480 | 0.9441 | 1.8583 | 140.51 | 92.56 |
| 2013 | 0.0018 | 2.1278 | 1.2093 | 0.8015 | 0.2032 | 1.5975 | 2.6829 | 2.7750 | 153.22 | 100.41 |
| 2014 | 0.0019 | 2.4165 | 1.5849 | 0.8717 | 0.3297 | 1.7084 | 2.2875 | 1.9568 | 166.49 | 108.57 |
| 2015 | 0.0019 | 2.3267 | 1.6011 | 0.9045 | 0.2799 | 1.9568 | 0.9221 | 1.9510 | 180.33 | 117.05 |
| 2016 | 0.0017 | 2.4382 | 1.5459 | 0.9908 | 0.3938 | 1.9022 | 1.0834 | 2.4339 | 194.72 | 125.85 |
| 2017 | 0.0018 | 2.6959 | 1.6664 | 1.0727 | 0.3467 | 2.2770 | 1.1743 | 2.3604 | 209.69 | 134.96 |
| 2018 | 0.0018 |  |  |  |  |  |  |  | 225.21 | 144.4 |

**eTable 2.: Last Month Cannabis Smoking Patterns – National Level**

| Year | Mean Days Cannabis Use | % Smoking Trivially - ≤3 Days / Month | Mean Days Smoked Trivially | % Smoking Non-Trivially - ≥3 Days / Month | Mean Days Smoked Non-Trivially |
| --- | --- | --- | --- | --- | --- |
|  |  |  |  |  |  |
| 2002 | 0.153 | 95.30% | 0.0114 | 4.68% | 0.248 |
| 2003 | 0.153 | 95.40% | 0.0124 | 4.57% | 0.247 |
| 2004 | 0.150 | 95.50% | 0.0123 | 4.47% | 0.242 |
| 2005 | 0.148 | 95.50% | 0.0113 | 4.49% | 0.240 |
| 2006 | 0.151 | 95.50% | 0.0121 | 4.46% | 0.244 |
| 2007 | 0.145 | 95.80% | 0.0119 | 4.25% | 0.233 |
| 2008 | 0.157 | 95.50% | 0.0119 | 4.55% | 0.254 |
| 2009 | 0.174 | 94.90% | 0.0120 | 5.10% | 0.282 |
| 2010 | 0.189 | 94.60% | 0.0123 | 5.36% | 0.307 |
| 2011 | 0.186 | 94.70% | 0.0131 | 5.30% | 0.301 |
| 2012 | 0.202 | 94.30% | 0.0123 | 5.69% | 0.328 |
| 2013 | 0.209 | 94.20% | 0.0134 | 5.81% | 0.339 |
| 2014 | 0.237 | 93.40% | 0.0143 | 6.60% | 0.386 |
| 2015 | 0.230 | 93.60% | 0.0142 | 6.44% | 0.374 |
| 2016 | 0.242 | 93.20% | 0.0151 | 6.78% | 0.393 |
| 2017 | 0.264 | 92.60% | 0.0159 | 7.35% | 0.430 |

**eTable 3.: Autism Rate by Ethnicity, Interactive Time-Dependent Model**

| **Parameter** | **Parameter** | | | **Model Parameters** | | | |
| --- | --- | --- | --- | --- | --- | --- | --- |
| **Estimate** | **95% C.I.** | **Pr(>|t|)** | **R-Squared** | **F** | **dF** | **P** |
|  |  |  |  |  |  |  |  |
| ***lm(log(Rate)~poly(Year,degree=2)*Race*** |  |  |  |  |  |  |  |
| American Indian / Alaksan Native | 1.22 | (1.00-1.44) | < 2e-16 | 0.812 | 23.44 | 20,84 | 6.14E-26 |
| Mixed_Race | 1.45 | (1.23-1.67) | < 2e-16 |  |  |  |  |
| NHWhite | 1.67 | (1.45-1.89) | < 2e-16 |  |  |  |  |
| NHBlack | 0.94 | (0.72-1.16) | 1.1E-13 |  |  |  |  |
| Native Hawaiian / Pacific Islander | 0.74 | (0.52-0.96) | 6.9E-10 |  |  |  |  |
| Hispanic | 0.47 | (0.25-0.69) | 2.3E-05 |  |  |  |  |
| poly(Year, degree = 2)1:Mixed_Race | 3.77 | (1.65-5.89) | 8.0E-04 |  |  |  |  |
| poly(Year, degree = 2)1:NHWhite | 3.21 | (1.09-5.33) | 0.004 |  |  |  |  |
| poly(Year, degree = 2)1:Native Hawaiian / PI | 2.30 | (0.18-4.42) | 0.037 |  |  |  |  |
| poly(Year, degree = 2)2:American Indian / AN | 2.17 | (0.05-4.29) | 0.049 |  |  |  |  |
| poly(Year, degree = 2)1:NHBlack | 2.00 | (-0.12-4.12) | 0.068 |  |  |  |  |
| poly(Year, degree = 2)1:American Indian / AN | 1.89 | (-0.23-4.01) | 0.085 |  |  |  |  |

**eTable 4.: Sensitivity Analysis**

| **Instrumental Variables** | **Parameter** | **Parameter** | | | **Model** | | | |
| --- | --- | --- | --- | --- | --- | --- | --- | --- |
| **Estimate** | **95% C.I.** | **Pr(>|t|)** | **Adj. R-Squ** | **ChiSq** | **dF** | **P** |
|  |  |  |  |  |  |  |  |  |
|  |  |  |  |  |  |  |  |  |
| ***DAILY CANNABIS USE RATES*** |  |  |  |  |  |  |  |  |
| ***Low Estimates*** |  |  |  |  |  |  |  |  |
| ***2 Lags, 1 Interactions*** |  |  |  |  |  |  |  |  |
| lag(Cannabis, Monthly), 0:2 | Black Ethnicity | 12.0930 | (12.09-12.09) | < 2.2e-16 | 1.0000 | 2.6x1011 | 8 | < 2.2e-16 |
| lag(Δ9THC_Exposure), 0:2 | Median Household Income | 7.5E-06 | (7.5E-6-7.5E-6) | < 2.2e-16 |  |  |  |  |
| lag(Cannabigerol_Exposure), 0:2 | Cigarettes, Monthly | 4.4978 | (4.49-4.5) | < 2.2e-16 |  |  |  |  |
| Cocaine_Annual | Hispanic Ethnicity | 0.1171 | (0.12-0.12) | < 2.2e-16 |  |  |  |  |
|  | Mean_Days_Cannabis_Potency | 0.2055 | (0.2-0.21) | < 2.2e-16 |  |  |  |  |
|  | Analgesics, Annual | 0.1588 | (0.16-0.16) | < 2.2e-16 |  |  |  |  |
|  | Cigarettes: Mean_Days_Cannabis_Potency | -0.9112 | (-0.91--0.91) | < 2.2e-16 |  |  |  |  |
|  | White Ethnicity | -8.1359 | (-8.14--8.13) | < 2.2e-16 |  |  |  |  |
|  |  |  |  |  |  |  |  |  |
| ***High Estimates*** |  |  |  |  |  |  |  |  |
| ***2 Lags, 1 Interactions*** |  |  |  |  |  |  |  |  |
| lag(Cannabis, Monthly), 0:2 | Black Ethnicity | 12.8670 | (12.85-12.89) | < 2.2e-16 | 1.0000 | 1.3x109 | 8 | < 2.2e-16 |
| lag(Δ9THC_Exposure), 0:2 | Median Household Income | 8.2E-06 | (8.2E-06-8.2E-06) | < 2.2e-16 |  |  |  |  |
| lag(Cannabigerol_Exposure), 0:2 | Cigarettes, Monthly | 4.8841 | (4.82-4.95) | < 2.2e-16 |  |  |  |  |
| Cocaine_Annual | Hispanic Ethnicity | 0.1297 | (0.13-0.13) | < 2.2e-16 |  |  |  |  |
|  | Mean_Days_Cannabis_Potency | 0.2185 | (0.21-0.23) | < 2.2e-16 |  |  |  |  |
|  | Analgesics, Annual | 0.1762 | (0.17-0.19) | < 2.2e-16 |  |  |  |  |
|  | Cigarettes: Mean_Days_Cannabis_Potency | -0.9664 | (-1.01--0.92) | < 2.2e-16 |  |  |  |  |
|  | White Ethnicity | -8.7028 | (-8.72--8.69) | < 2.2e-16 |  |  |  |  |
|  |  |  |  |  |  |  |  |  |
|  |  |  |  |  |  |  |  |  |
| ***FIRST TRIMESTER PREGNANCY DAILY CANNABIS USE RATES*** | | | | |  |  |  |  |
| ***Low Estimates*** |  |  |  |  |  |  |  |  |
| ***2 Lags, 1 Interactions*** |  |  |  |  |  |  |  |  |
| lag(Cannabis, Monthly), 0:2 | First_Trimester_Cannabis_Exposure | 0.1400 | (0.11-0.17) | < 2.2e-16 | 0.9984 | 5727.8 | 4 | < 2.2e-16 |
| lag(Δ9THC_Exposure), 0:2 | First_Trimester_Cannabis_Exposure: THC_Potency | -0.0651 | (-0.07--0.06) | < 2.2e-16 |  |  |  |  |
| lag(Cannabigerol_Exposure), 0:2 | White Ethnicity | -5.0199 | (-5.71--4.33) | < 2.2e-16 |  |  |  |  |
| Cocaine_Annual | Cocaine, Annual | 0.1935 | (0.12-0.26) | 7.12E-08 |  |  |  |  |
|  |  |  |  |  |  |  |  |  |
| ***High Estimates*** |  |  |  |  |  |  |  |  |
| ***2 Lags, 1 Interactions*** |  |  |  |  |  |  |  |  |
| lag(Cannabis, Monthly), 0:2 | First_Trimester_Cannabis_Exposure | 0.1484 | (0.12-0.18) | < 2.2e-16 | 0.9978 | 5702.4 | 4 | < 2.2e-16 |
| lag(Δ9THC_Exposure), 0:2 | First_Trimester_Cannabis_Exposure: THC_Potency | -0.0690 | (-0.08--0.06) | < 2.2e-16 |  |  |  |  |
| lag(Cannabigerol_Exposure), 0:2 | White Ethnicity | -5.3810 | (-6.12--4.64) | < 2.2e-16 |  |  |  |  |
| Cocaine_Annual | Cocaine, Annual | 0.2041 | (0.13-0.28) | 1.07E-07 |  |  |  |  |

**eTable 5.: Spatiotemporal spreml Lagged Models with Drugs, Ethnicity and Socioeconomic Covariates**

| **General** | **Parameters** | | | | **Model** | | | |
| --- | --- | --- | --- | --- | --- | --- | --- | --- |
| **Instumental** + **L Lagged Variables** | **Parameter** | **Estimate** | **95% C.I.** | **P-Value** | **LogLik** | **Parameters** | **Value** | **P-Value** |
|  |  |  |  |  |  |  |  |  |
| mrjmon | ***0 Lags*** |  |  |  |  |  |  |  |
| Δ9THC | NHWhite Ethnicity | 2.20 | (1.7-2.7) | < 2.2e-16 | 220.313 | phi | 5.7E-07 | 1 |
| Cannabigerol | NHAsian Ethnicity | 0.47 | (0.38-0.55) | < 2.2e-16 |  | psi | 0.9396 | < 2.2e-16 |
| NHWhite_Score | NHAIAN Ethnicity | -0.05 | (-0.07--0.02) | 7.6E-05 |  | rho | -0.5652 | 4.8E-08 |
| NHBlack_Score | Abuse/Dependence_Alcohol | -30.58 | (-51.74--9.42) | 0.005 |  | lambda | 0.5374 | < 2.2e-16 |
| Hispanic_Score | Cannabis_Monthly: Abuse/Dependence_Alcohol | -10.59 | (-18.15--3.02) | 0.006 |  |  |  |  |
| NHAsian_Score | Cannabis_Monthly | 0.76 | (0.15-1.37) | 0.015 |  |  |  |  |
| NHAIAN_Score |  |  |  |  |  |  |  |  |
|  |  |  |  |  |  |  |  |  |
| mrjmon,0:2 | ***2 Lags*** |  |  |  |  |  |  |  |
| Δ9THC, 0:2 | NHWhite Ethnicity | 2.20 | (1.62-2.77) | 6.0E-14 | 172.681 | phi | 5.1E-06 | NA |
| Cannabigerol, 0:2 | NHAsian Ethnicity | 0.40 | (0.29-0.51) | 3.3E-13 |  | psi | 0.9415 | NA |
| NHWhite_Score, 0:2 | NHAIAN Ethnicity | -0.05 | (-0.07--0.02) | 5.1E-05 |  | rho | -0.5333 | 5.2E-06 |
| NHBlack_Score, 0:2 | Cigarettes :Cannabis_Monthly :Abuse/Dependence_Alcohol | 8.41 | (3.08-13.74) | 0.002 |  | lambda | 0.5042 | 1.36E-14 |
| Hispanic_Score, 0:2 | NHBlack Ethnicity | 0.11 | (0.03-0.19) | 0.005 |  |  |  |  |
| NHAsian_Score, 0:2 | Cannabis_Monthly:Abuse/Dependence_Alcohol | -2.38 | (-4.07--0.68) | 0.006 |  |  |  |  |
| NHAIAN_Score, 0:2 |  |  |  |  |  |  |  |  |
|  |  |  |  |  |  |  |  |  |
| mrjmon,0:3 | ***3 Lags*** |  |  |  |  |  |  |  |
| Δ9THC, 0:3 | NHWhite Ethnicity | 2.36 | (1.74-2.98) | 9.0E-14 | 148.126 | phi | 1.7E-05 | 1.0000 |
| Cannabigerol, 0:3 | NHAsian Ethnicity | 0.46 | (0.33-0.58) | 4.2E-13 |  | psi | 0.9485 | < 2.2e-16 |
| NHWhite_Score, 0:3 | NHAIAN Ethnicity | -0.05 | (-0.07--0.03) | 9.4E-06 |  | rho | -0.4960 | 0.0002 |
| NHBlack_Score, 0:3 | Cigarettes | -12.23 | (-21.63--2.82) | 0.011 |  | lambda | 0.4458 | 1.6E-08 |
| Hispanic_Score, 0:3 | Cigarettes :Cannabis_Monthly | -3.87 | (-7.29--0.45) | 0.026 |  |  |  |  |
| NHAsian_Score, 0:3 | NHBlack Ethnicity | 0.09 | (0.01-0.17) | 0.027 |  |  |  |  |
| NHAIAN_Score, 0:3 | Cannabis_Monthly | 0.91 | (0.04-1.78) | 0.040 |  |  |  |  |

**eTable 6.: Spatiotemporal spreml Lagged Models with Drugs, Ethnic Cannabis Use and Socioeconomic Covariates**

| **General** | **Parameters** | | | | **Model** | | | |
| --- | --- | --- | --- | --- | --- | --- | --- | --- |
| **Instumental** + **L Lagged Variables** | **Parameter** | **Estimate** | **95% C.I.** | **P-Value** | **LogLik** | **Parameters** | **Value** | **P-Value** |
|  |  |  |  |  |  |  |  |  |
|  | ***0 Lags*** |  |  |  |  |  |  |  |
| Cannabis, Monthly,0:2 | Median Household Income | 0.454 | (0.28-0.63) | 5.1E-07 | 193.321 | phi | 1.5E-05 | 1 |
| Δ9THC, 0:2 | Ethnic_Cannabis_Exposure_Score | 0.177 | (0.09-0.26) | 4.6E-05 |  | psi | 0.9426 | < 2.2e-16 |
| Cannabigerol, 0:2 | Cigarettes: Abuse/Dependence_Alcohol | -55.483 | (-88.24--22.72) | 0.001 |  | rho | -0.7467 | < 2.2e-16 |
| NHWhite_Score | Cannabis, Monthly: Abuse/Dependence_Alcohol | -4.851 | (-8.01--1.69) | 0.003 |  | lambda | 0.6971 | < 2.2e-16 |
| NHBlack_Score | Cannabis, Monthly | 0.631 | (0.13-1.13) | 0.014 |  |  |  |  |
| Hispanic_Score | Cigarettes: Cannabis, Monthly | -1.064 | (-2.04--0.09) | 0.033 |  |  |  |  |
| NHAsian_Score |  |  |  |  |  |  |  |  |
| NHAIAN_Score |  |  |  |  |  |  |  |  |
|  |  |  |  |  |  |  |  |  |
|  | ***2 Lags*** |  |  |  |  |  |  |  |
| Cannabis, Monthly,0:2 | Cigarettes: Cannabis, Monthly: Abuse/Dependence_Alcohol | 10.881 | (5.97-15.79) | 1.4E-05 | 144.755 | phi | 2.9E-05 | 1 |
| Δ9THC, 0:2 | Cannabis, Monthly: Abuse/Dependence_Alcohol | -2.654 | (-4.27--1.04) | 0.001 |  | psi | 0.9465 | < 2.2e-16 |
| Cannabigerol, 0:2 | Ethnic_Cannabis_Exposure_Score | 0.136 | (0.05-0.22) | 0.002 |  | rho | -0.7320 | 2.0E-12 |
| NHWhite_Score, 0:2 | MHInc | 0.326 | (0.12-0.53) | 0.002 |  | lambda | 0.6938 | 2.2E-16 |
| NHBlack_Score, 0:2 |  |  |  |  |  |  |  |  |
| Hispanic_Score, 0:2 |  |  |  |  |  |  |  |  |
| NHAsian_Score, 0:2 |  |  |  |  |  |  |  |  |
| NHAIAN_Score, 0:2 |  |  |  |  |  |  |  |  |
|  |  |  |  |  |  |  |  |  |
|  | ***4 Lags*** |  |  |  |  |  |  |  |
| Cannabis, Monthly,0:4 | Ethnic_Cannabis_Exposure_Score | 0.161 | (0.07-0.26) | 0.001 | 97.4994 | phi | 9.5941 | NA |
| Δ9THC, 0:4 | Cannabis, Monthly: Abuse/Dependence_Alcohol | -2.587 | (-4.59--0.58) | 0.012 |  | psi | 0.7824 | < 2.2e-16 |
| Cannabigerol, 0:2 | Cannabis, Monthly: Abuse/Dependence_Alcohol: Cigarettes | 10.270 | (3.91-16.63) | 0.002 |  | rho | -0.7340 | 4.7E-08 |
| NHWhite_Score, 0:4 |  |  |  |  |  | lambda | 0.6594 | < 2.2e-16 |
| NHBlack_Score, 0:4 |  |  |  |  |  |  |  |  |
| Hispanic_Score, 0:4 |  |  |  |  |  |  |  |  |
| NHAsian_Score, 0:4 |  |  |  |  |  |  |  |  |
| NHAIAN_Score, 0:4 |  |  |  |  |  |  |  |  |

**eTable 7.: Final Geospatial Regression Models Including Model Parameters**

| **General** | **Parameters** | | | | **Model** | | | |
| --- | --- | --- | --- | --- | --- | --- | --- | --- |
| **Instumental** + **Lagged Variables** | **Parameter** | **Estimate** | **95% C.I.** | **P-Value** | **LogLik** | **Parameters** | **Value** | **P-Value** |
|  |  |  |  |  |  |  |  |  |
| ***0 Lags*** |  |  |  |  |  |  |  |  |
| Cannabis, Monthly | NHAsian Ethnicity | 0.43 | (0.33-0.53) | < 2.2e-16 | 233.366 | phi | 1.6E-07 | NA |
| Δ9THC | NHWhite Ethnicity | 2.01 | (1.42-2.6) | 1.5E-11 |  | psi | 0.9386 | < 2.2e-16 |
| Cannabigerol | Cannabigerol: Alcohol_Abuse | -13.77 | (-19.41--8.13) | 1.8E-06 |  | rho | -0.6020 | 2.2E-09 |
| NHWhite_Score | Alcohol_Abuse | -44.35 | (-65.89--22.81) | 5.5E-05 |  | lambda | 0.5000 | < 2.2e-16 |
| NHBlack_Score | Cannabigerol | 0.81 | (0.34-1.28) | 9.0E-04 |  |  |  |  |
| Hispanic_Score | NHAIAN Ethnicity | -0.04 | (-0.06--0.02) | 0.002 |  |  |  |  |
| NHAsian_Score | Cigarettes: Cannabigerol: Alcohol_Abuse | 8.91 | (2.79-15.03) | 0.004 |  |  |  |  |
| NHAIAN_Score | Δ9THC | 4.59 | (1.41-7.77) | 0.005 |  |  |  |  |
|  | Cigarettes: Δ9THC | -16.23 | (-28.64--3.82) | 0.010 |  |  |  |  |
|  | Δ9THC: Cannabigerol | 0.94 | (0.21-1.67) | 0.011 |  |  |  |  |
|  | Cigarettes: Δ9THC: Cannabigerol | -3.39 | (-6.21--0.57) | 0.018 |  |  |  |  |
|  |  |  |  |  |  |  |  |  |
|  |  |  |  |  |  |  |  |  |
| ***2 Lags*** |  |  |  |  |  |  |  |  |
| Cannabis, Monthly,0:2 | NHAsian Ethnicity | 0.42 | (0.3-0.54) | 3.1E-12 | 178.8988 | phi | 0.0000 | 1.0000 |
| Δ9THC, 0:2 | NHWhite Ethnicity | 1.95 | (1.22-2.68) | 1.2E-07 |  | psi | 0.9378 | < 2.2e-16 |
| Cannabigerol, 0:2 | Alcohol_Abuse | -43.92 | (-69.97--17.87) | 0.001 |  | rho | -0.4350 | 0.0011 |
| NHWhite_Score, 0:2 | NHAIAN Ethnicity | -0.06 | (-0.1--0.02) | 0.001 |  | lambda | 0.4158 | 5.4E-07 |
| NHBlack_Score, 0:2 | Cannabigerol: Alcohol_Abuse | -11.24 | (-18.12--4.36) | 0.001 |  |  |  |  |
| Hispanic_Score, 0:2 | Δ9THC | 1.14 | (0.36-1.92) | 0.005 |  |  |  |  |
| NHAsian_Score, 0:2 | Cannabigerol | 0.81 | (0.22-1.4) | 0.007 |  |  |  |  |
| NHAIAN_Score, 0:2 | Δ9THC: Cannabigerol | 0.25 | (0.03-0.47) | 0.023 |  |  |  |  |
|  | NHAfrican-American Ethnicity | 0.08 | (0-0.16) | 0.046 |  |  |  |  |
|  |  |  |  |  |  |  |  |  |
|  |  |  |  |  |  |  |  |  |
|  |  |  |  |  |  |  |  |  |
|  |  |  |  |  |  |  |  |  |
| ***4 Lags*** |  |  |  |  |  |  |  |  |
| Cannabis, Monthly,0:4 | NHAIAN Ethnicity | -0.11 | (-0.13--0.09) | 9.0E-15 | 132.859 | phi | 7.3530 | 0.0002 |
| Δ9THC, 0:4 | NHAsian Ethnicity | 0.37 | (0.23-0.51) | 1.9E-07 |  | psi | 0.8793 | < 2.2e-16 |
| Cannabigerol, 0:4 | NHWhite Ethnicity | 1.52 | (0.74-2.3) | 1.0E-04 |  | rho | -0.4960 | 0.0011 |
| NHWhite_Score, 0:4 | Cannabigerol: Alcohol_Abuse | -22.68 | (-34.89--10.47) | 3.0E-04 |  | lambda | 0.3196 | 0.0016 |
| NHBlack_Score, 0:4 | Δ9THC | 1.96 | (0.88-3.04) | 4.0E-04 |  |  |  |  |
| Hispanic_Score, 0:4 | Alcohol_Abuse | -72.45 | (-114.28--30.62) | 7.0E-04 |  |  |  |  |
| NHAsian_Score, 0:4 | Cigarettes: Cannabigerol: Alcohol_Abuse | 71.65 | (25.41-117.89) | 0.002 |  |  |  |  |
| NHAIAN_Score, 0:4 | Cigarettes: Δ9THC | -6.44 | (-10.63--2.25) | 0.003 |  |  |  |  |
|  | Cigarettes: Alcohol_Abuse | 214.56 | (56.98-372.14) | 0.008 |  |  |  |  |

Technical Notes:

logLik Log (Likelihood ratio) at model optimization

phi: idiosyncratic component of the spatial error term

psi: individual time-invariant component of the spatial error term

rho: spatial autoregressive parameter

lambda: spatial autocorrelation coefficient

**eTable 8.: Autism Rate by Deciles of Cannabinoid Exposure**

| **Decile** | **THC Exposure Decile** | **Cannabigerol Exposure Decile** | **Log (Autism Rate)** | **Autism Rate** |
| --- | --- | --- | --- | --- |
| **1** | 0.3310 | 0.0122 | -1.9570 | 0.1413 |
| **2** | 0.4435 | 0.0165 | -2.9822 | 0.0507 |
| **3** | 0.5560 | 0.0208 | -2.6186 | 0.0729 |
| **4** | 0.6685 | 0.0250 | -2.1174 | 0.1203 |
| **5** | 0.7810 | 0.0293 | -1.4031 | 0.2458 |
| **6** | 0.8935 | 0.0336 | -0.5715 | 0.5647 |
| **7** | 1.0050 | 0.0379 | 0.3198 | 1.3768 |
| **8** | 1.1150 | 0.0422 | 1.2359 | 3.4413 |
| **9** | 1.2300 | 0.0464 | 2.2076 | 9.0938 |
| **10** | 1.3450 | 0.0507 | 3.1820 | 24.0940 |

**eTable 9.: Linear Regression Models by Cannabinoid Exposure**

| **Parameter** | **Parameter** | | | **Model Parameters** | | | |
| --- | --- | --- | --- | --- | --- | --- | --- |
| **Estimate** | **CI** | **Pr(>|t|)** | **Adj. R-Squared** | **F** | **dF** | **P** |
|  |  |  |  |  |  |  |  |
| ***ΔTHC_Exposure*** |  |  |  |  |  |  |  |
| Intercept | -6.604 | (-7.23--5.98) | 1.5E-07 | 0.9820 | 437.7 | 1,7 | 1.4E-07 |
| THC_Decile | 7.053 | (6.39-7.71) | 1.4E-07 |  |  |  |  |
|  |  |  |  |  |  |  |  |
| ***Cannabigerol_Exposure*** |  |  |  |  |  |  |  |
| Intercept | -6.525 | (-7.14--5.91) | 1.5E-07 | 0.9818 | 432.9 | 1,7 | 1.5E-07 |
| Cannabigerol_Decile | 185.334 | (167.88-202.79) | 1.5E-07 |  |  |  |  |

**eTable 10.: Weighted Mixed Effects Regression Models**

| **Parameter** | **Value** | **C.I.** | **P-Value** | **AIC** | **BIC** | **logLik** |
| --- | --- | --- | --- | --- | --- | --- |
|  |  |  |  |  |  |  |
| ***Additive*** |  |  |  |  |  |  |
| NHAsian | 2.25 | (2.1-2.4) | 0.0000 | 1635.9 | 1701.142 | -801.9501 |
| Cigarettes | 10.03 | (8.42-11.64) | 0.0000 |  |  |  |
| NHWhite | 7.36 | (5.9-8.81) | 0.0000 |  |  |  |
| NHAfric.Am | 0.42 | (0.32-0.51) | 0.0000 |  |  |  |
| NHAfric.Am.Cannabis | 0.51 | (0.39-0.63) | 0.0000 |  |  |  |
| Cannabis | 0.39 | (0.3-0.49) | 0.0000 |  |  |  |
| NHAIAN.Cannabis | 0.26 | (0.1-0.41) | 0.0011 |  |  |  |
| Alcohol | 4.23 | (1.65-6.81) | 0.0014 |  |  |  |
| NHAsian.Cannabis | -0.35 | (-0.53--0.18) | 0.0001 |  |  |  |
| NHWhite.Cannabis | -1.18 | (-1.56--0.8) | 0.0000 |  |  |  |
| Median.Household.Income | -1.02 | (-1.23--0.81) | 0.0000 |  |  |  |
| Analgesics | -1.05 | (-1.25--0.85) | 0.0000 |  |  |  |
| NHAIAN | -0.29 | (-0.32--0.27) | 0.0000 |  |  |  |
|  |  |  |  |  |  |  |
| ***Interactive*** |  |  |  |  |  |  |
| NHAsian | 2.2 | (2.02-2.38) | 0.0000 | 1161.311 | 1333.9 | -537.6553 |
| NHWhite | 6 | (4.51-7.49) | 0.0000 |  |  |  |
| Cigarettes: Cocaine | 11011.7 | (4362.11-17661.29) | 0.0013 |  |  |  |
| Cigarettes: Cannabis: Cocaine | 3753.1 | (1451.28-6054.92) | 0.0015 |  |  |  |
| Cigarettes | 44159.3 | (16925-71393.6) | 0.0016 |  |  |  |
| Cigarettes: Cannabis | 15065.8 | (5585.85-24545.75) | 0.002 |  |  |  |
| Cigarettes: Analgesics: Cocaine | 3437.8 | (1250.87-5624.73) | 0.0022 |  |  |  |
| NHWhite.Cannabis | 2 | (0.73-3.27) | 0.0026 |  |  |  |
| Cigarettes: Analgesics | 13881.8 | (4913.11-22850.49) | 0.0026 |  |  |  |
| Cigarettes: Cannabis: Analgesics: Cocaine | 1167.2 | (409.64-1924.76) | 0.0027 |  |  |  |
| Cigarettes: Cannabis: Analgesics | 4717 | (1593.82-7840.18) | 0.0033 |  |  |  |
| Alcohol: Cocaine | 29956.9 | (10079.93-49833.87) | 0.0033 |  |  |  |
| Alcohol | 116488.8 | (35362.52-197615.08) | 0.0052 |  |  |  |
| Alcohol: Cannabis: Cocaine | 9890.4 | (2955.51-16825.29) | 0.0055 |  |  |  |
| Alcohol: Analgesics: Cocaine | 9054.8 | (2513.05-15596.55) | 0.007 |  |  |  |
| Alcohol: Cannabis | 38348.6 | (9877.05-66820.15) | 0.0087 |  |  |  |
| Alcohol: Analgesics | 35355.3 | (8616-62094.6) | 0.0099 |  |  |  |
| Alcohol: Cannabis: Analgesics: Cocaine | 2955.3 | (673.59-5237.01) | 0.0116 |  |  |  |
| Alcohol: Cannabis: Analgesics | 11491.4 | (2112.41-20870.39) | 0.0168 |  |  |  |
| NHAfric.Am | -0.2 | (-0.38--0.02) | 0.0361 |  |  |  |
| Cigarettes: Alcohol: Cannabis: Analgesics | -44585.5 | (-83013.59--6157.41) | 0.0236 |  |  |  |
| Cigarettes: Alcohol: Cannabis: Analgesics: Cocaine | -11208 | (-20538.09--1877.91) | 0.0191 |  |  |  |
| Cigarettes: Alcohol: Analgesics | -134314.4 | (-243691.57--24937.23) | 0.0166 |  |  |  |
| Cigarettes: Alcohol: Analgesics: Cocaine | -33719.9 | (-60413.22--7026.58) | 0.0137 |  |  |  |
| Cigarettes: Alcohol: Cannabis | -148642.8 | (-265262.04--32023.56) | 0.0129 |  |  |  |
| NHAIAN.Cannabis | -0.3 | (-0.5--0.1) | 0.0114 |  |  |  |
| Cigarettes: Alcohol: Cannabis: Cocaine | -37573.7 | (-65923.02--9224.38) | 0.0098 |  |  |  |
| Cigarettes: Alcohol | -442990.4 | (-774888.78--111092.02) | 0.0093 |  |  |  |
| NHAsian.Cannabis | -0.3 | (-0.54--0.06) | 0.0078 |  |  |  |
| Cigarettes: Alcohol: Cocaine | -111926.8 | (-193046.54--30807.06) | 0.0072 |  |  |  |
| Cannabis: Analgesics | -1185.9 | (-1950.77--421.03) | 0.0025 |  |  |  |
| Cannabis: Analgesics: Cocaine | -299.1 | (-485.1--113.1) | 0.0018 |  |  |  |
| Analgesics | -3563.9 | (-5763.76--1364.04) | 0.0016 |  |  |  |
| Cannabis | -3797.8 | (-6120.05--1475.55) | 0.0015 |  |  |  |
| Analgesics: Cocaine | -898 | (-1436.04--359.96) | 0.0012 |  |  |  |
| Cannabis: Cocaine | -962.9 | (-1528.16--397.64) | 0.0009 |  |  |  |
| Cocaine | -2876.2 | (-4511.86--1240.54) | 0.0006 |  |  |  |
| Hispanic.Cannabis | -0.8 | (-1.21--0.39) | 0.0002 |  |  |  |
| Median.Household.Income | -1.2 | (-1.51--0.89) | 0.0000 |  |  |  |
| NHAIAN | -0.2 | (-0.24--0.16) | 0.0000 |  |  |  |
